# Supplementary material
Source: PubMed Central journal article supplement (PMC6491663)
Supplement: NIHMS1025770-supplement-SI.pdf [file NIHMS1025770-supplement-SI.pdf]

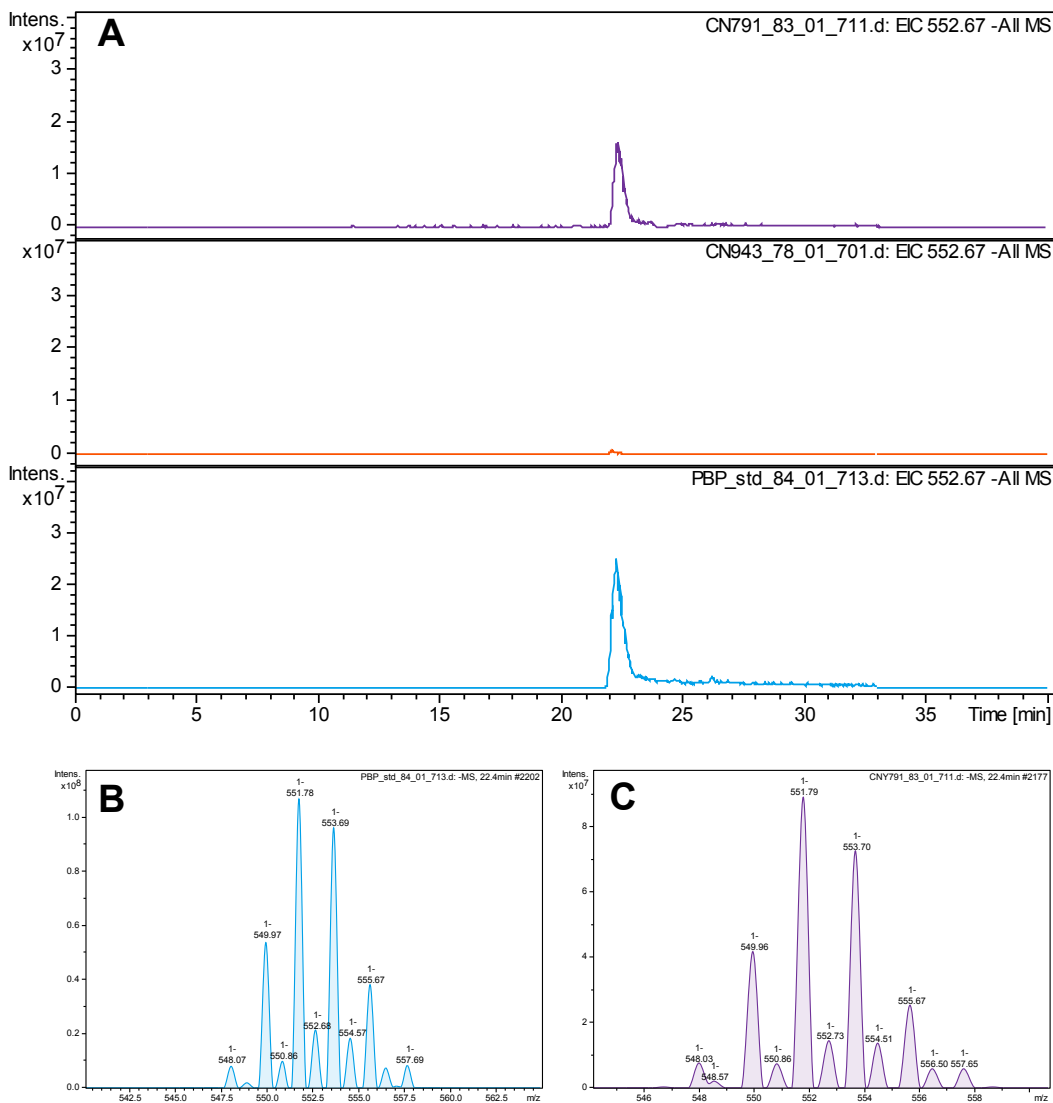

**Figure S1. Detection of pentabromopseudilin by LCMS.** Strains isolated as part of this study were screened for pentabromopseudilin production. (A) Extracted ion chromatograms for the mass of pentabromopseudilin (553.67 g/mol) from a strain with version A of the BGC (CNY-791, top) and one that lacks the BGC (CNY-943, middle). Pentabromopseudilin standard (bottom). All strains containing *bmp* version A produced pentabromopseudilin with an absolute intensity of at least  $1.4 \times 10^6$  (B) Isotopic pattern of a pentabromopseudilin standard and the compound detected from strain CNY-791 (C).

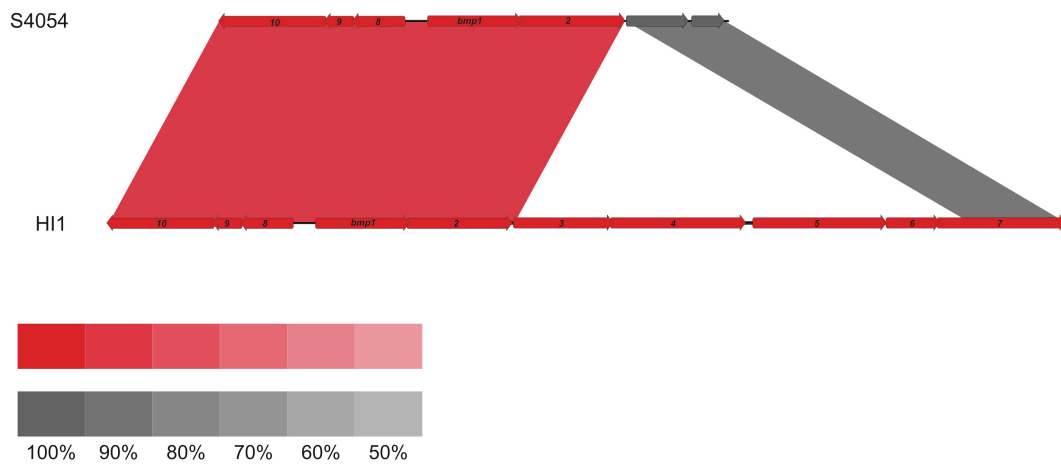

**Figure S2. Evidence for partial loss of the *bmp* cluster.** A region immediately downstream of *bmp2* in strain S4054 (version E) has high sequence identity to a portion of *bmp7* in strain HI1 (version A), supporting gene loss in S4054.

**Table S1. Source of *Pseudoalteromonas* strains isolated as part of this study.**

| Strain ID | Sample Location                   | Sample Type  |
|-----------|-----------------------------------|--------------|
| CNY-791   | Santa Catalina Island, California | Green alga   |
| CNY-846   | La Jolla, California              | Plankton tow |
| CNY-848   | La Jolla, California              | Seawater     |
| CNY-849   | La Jolla, California              | Seawater     |
| CNY-905   | Santa Catalina Island, California | Red alga     |
| CNY-942   | La Jolla, California              | Plankton tow |
| CNY-943   | La Jolla, California              | Plankton tow |
| CNY-992   | Coral Coast, Fiji                 | Green alga   |
| CNY-993   | Coral Coast, Fiji                 | Red alga     |
| CNY-996   | Coral Coast, Fiji                 | Brown alga   |
| CNY-997   | Coral Coast, Fiji                 | Red alga     |
| CNZ-001   | Coral Coast, Fiji                 | Green alga   |
| CNZ-002   | Coral Coast, Fiji                 | Green alga   |
| CNZ-004   | Coral Coast, Fiji                 | Red alga     |
| CNZ-006   | Coral Coast, Fiji                 | Red alga     |
| CNZ-010   | Coral Coast, Fiji                 | Green alga   |
| CNZ-012   | Coral Coast, Fiji                 | Red alga     |

**Table S2. Type strains without published genome sequences.**

| Strain ID   | Species                | 16S accession number | <i>gyrB</i> accession number |
|-------------|------------------------|----------------------|------------------------------|
| DSM 14585   | <i>agarivorans</i>     | AJ417594             | KF793928                     |
| LMG 22059T  | <i>aliena</i>          | AY387858             | FR668563                     |
| LMG 18002T  | <i>antarctica</i>      | X98336               | FR668564                     |
| NCIMB 14688 | <i>arabiensis</i>      | AB576636             | N/A                          |
| ATCC 19262  | <i>atlantica</i>       | X82134               | AB100885                     |
| ATCC 33046  | <i>aurantia</i>        | X82135               | AF007275                     |
| KCTC 12274  | <i>byunsanensis</i>    | DQ011289             | N/A                          |
| DSM 6820T   | <i>carrageenovora</i>  | X82136               | FR668560                     |
| ATCC 43337  | <i>denitrificans</i>   | X82138               | N/A                          |
| KCTC 22219  | <i>donghaensis</i>     | FJ754319             | N/A                          |
| LMG 2866T   | <i>espejana</i>        | X82143               | FR668566                     |
| LMG 19697T  | <i>issachenkonii</i>   | AF316144             | FR668568                     |
| JCM 15903   | <i>lipolytica</i>      | FJ404721             | N/A                          |
| LMG 19692   | <i>maricaloris</i>     | AF144036             | N/A                          |
| NCIMB 1770  | <i>mariniglutinosa</i> | AJ507251             | N/A                          |
| LMG 2227T   | <i>nigrifaciens</i>    | X82146               | FR668569                     |
| LMG 19696T  | <i>paragorgicola</i>   | AY040229             | FR668570                     |
| DSM 14001T  | <i>peptidolytica</i>   | AF007286             | FR668573                     |
| CIP 105820  | <i>pydzensis</i>       | U85855               | N/A                          |
| LMG 19699   | <i>ruthenica</i>       | AF316891             | N/A                          |
| SE3         | <i>shioyasakiensis</i> | AB720724             | N/A                          |
| ATCC 51193  | <i>tetradonis</i>      | AF214730             | N/A                          |
| LMG 19694T  | <i>translucida</i>     | AY040230             | FR668571                     |
| NCIMB 13762 | <i>ulvae</i>           | AF172987             | N/A                          |
| Y2T         | <i>xiamenensis</i>     | JN188399             | N/A                          |
| E418        | <i>xishaensis</i>      | JQ237129             | N/A                          |

**Table S3. *Pseudoalteromonas* genomes used in this study.** Type strains indicated in bold. Roman numerals (I-XXVIII) correspond to the 28 ANI groups (95%) that lack type strains (from Fig. 3). Asterisks (\*) indicate 95% ANI groups where type strain genome sequences were unavailable.

| Strain        | Species                              | <i>Bmp</i> version | Genome size (Mb) | Coverage | No. of contigs | G+C content (%) | Number of coding sequences | GenBank accession number |
|---------------|--------------------------------------|--------------------|------------------|----------|----------------|-----------------|----------------------------|--------------------------|
| 10-33         | <i>P. marina</i>                     | n/a                | 4.20             | 109.1x   | 29             | 39.7            | 3805                       | LOFI01000000             |
| 13-15         | <i>P. sp. VIII</i>                   | n/a                | 4.10             | unknown  | 2              | 39.8            | 3709                       | FSRF01000000             |
| 23 GOM1509m   | <i>P. issachenkonii</i> * (sp. X)    | n/a                | 4.06             | unknown  | 31             | 40.2            | 3689                       | JADO01000000             |
| 2ta16         | <i>P. sp. XXV</i>                    | A                  | 6.36             | 50.0x    | 137            | 42.3            | 5477                       | AUSV00000000             |
| 2ta6          | <i>P. elyakovii/piscicida</i>        | n/a                | 5.48             | unknown  | 83             | 43.3            | 4797                       | JGI Taxon ID: 2505119014 |
| 520P1 No. 412 | <i>P. denitrificans</i> * (sp. I)    | n/a                | 5.25             | 10.5x    | 299            | 35.0            | 4911                       | BBIN01000000             |
| 520P1 No. 423 | <i>P. denitrificans</i> * (sp. I)    | n/a                | 5.34             | 25x      | 2              | 35.2            | 5021                       | BBZB01000000             |
| 6BO GOM1096m  | <i>P. issachenkonii</i> * (sp. X)    | n/a                | 4.06             | unknown  | 34             | 40.2            | 3691                       | JIAM01000000             |
| A 37-1-2      | <b><i>P. arctica</i></b>             | n/a                | 4.62             | 221x     | 152            | 39.0            | 4173                       | AHBY02000000             |
| A2            | <i>P. issachenkonii</i> * (sp. X)    | n/a                | 4.18             | 286x     | 57             | 40.1            | 3838                       | JPMC01000000             |
| A757          | <i>P. sp. III</i>                    | D                  | 5.13             | 230x     | 82             | 43.0            | 4532                       | QNQN00000000             |
| AC163         | <i>P. distincta/flavipulchra</i>     | n/a                | 4.78             | 100x     | 565            | 39.1            | 4331                       | AUTK01000000             |
| ANT/505       | <i>P. distincta/flavipulchra</i>     | n/a                | 4.49             | 16.6x    | 142            | 39.3            | 4187                       | ADOP01000000             |
| ATCC 14393    | <b><i>P. haloplanktis</i></b>        | n/a                | 5.02             | 104x     | 56             | 40.8            | 4402                       | AHCA01000000             |
| ATCC 29581    | <i>P. xiamenensis</i> * (sp. XXVIII) | n/a                | 4.05             | unknown  | 61             | 41.9            | 3614                       | CAPN01000000             |
| ATCC 700518   | <b><i>P. distincta</i></b>           | n/a                | 4.53             | 383x     | 32             | 39.2            | 4038                       | JWIG01000000             |
| ATCC 700519   | <b><i>P. elyakovii</i></b>           | n/a                | 5.45             | 314x     | 25             | 43.3            | 4767                       | JWIH01000000             |

|                  |                                                      |     |      |         |     |      |      |              |
|------------------|------------------------------------------------------|-----|------|---------|-----|------|------|--------------|
| BSi20311         | <i>P. sp. IX</i>                                     | n/a | 3.98 | 23x     | 195 | 40.3 | 3664 | BADU01000000 |
| BSi20429         | <i>P. arctica</i>                                    | n/a | 4.50 | 19x     | 121 | 39.0 | 3990 | BADV01000000 |
| BSi20439         | <i>P. sp. IX</i>                                     | n/a | 3.88 | 21x     | 243 | 40.2 | 3600 | BADW01000000 |
| BSi20480         | <i>P. marina</i>                                     | n/a | 4.15 | 17x     | 201 | 39.6 | 3937 | BADX01000000 |
| BSi20495         | <i>P. fuliginea</i>                                  | n/a | 4.83 | 18x     | 222 | 38.9 | 4323 | BADY01000000 |
| BSi20652         | <i>P. sp. XI</i>                                     | n/a | 4.25 | 15x     | 298 | 38.9 | 4056 | BADT01000000 |
| BSw20308         | <i>P. fuliginea</i>                                  | n/a | 4.76 | 85x     | 146 | 38.9 | 4186 | AMYA01000000 |
| CGCMCC<br>1.8499 | <i>P.<br/>donghaensis/lipolytica*</i><br>(sp. XVIII) | n/a | 4.54 | unknown | 52  | 41.5 | 4032 | FPAZ01000000 |
| CP76             | <i>P. ruthenica*</i> (sp. V)                         | n/a | 4.01 | 18x     | 120 | 47.6 | 3672 | AOPM00000000 |
| CPMOR-1          | <i>P. sp. XXII</i>                                   | A   | 5.97 | 100x    | 105 | 42.0 | 5255 | AUYC00000000 |
| CPMOR-2          | <i>P. luteoviolacea</i>                              | A   | 5.85 | 100x    | 155 | 41.7 | 5057 | AUYA01000000 |
| D2               | <b><i>P. tunicata</i></b>                            | n/a | 4.98 | unknown | 42  | 39.9 | 4400 | AAOH01000000 |
| DSM 15748        | <b><i>P. fuliginea</i></b>                           | n/a | 4.77 | 430x    | 314 | 38.9 | 4147 | JJNZ01000000 |
| DSM 17587        | <b><i>P. marina</i></b>                              | n/a | 4.17 | 243x    | 69  | 39.6 | 3794 | AHCB02000000 |
| DSM 6061         | <b><i>P. luteoviolacea</i></b>                       | A   | 5.89 | 100x    | 168 | 41.8 | 5113 | AUYB01000000 |
| DSM 6065         | <b><i>P. undina</i></b>                              | n/a | 4.00 | 255x    | 49  | 39.9 | 3638 | AHCF02000000 |
| DSM 6842         | <b><i>P. rubra</i></b>                               | n/a | 5.95 | 183x    | 194 | 47.8 | 5003 | AHCD02000000 |
| DSM 8771         | <b><i>P. citrea</i></b>                              | n/a | 5.32 | 149x    | 223 | 41.1 | 4552 | AHBZ02000000 |
| DSM 26666        | <i>P. issachenkonii*</i> (sp. X)                     | n/a | 4.02 | unknown | 19  | 40.2 | 3657 | FPAR01000000 |
| DSM 6059         | <i>P. sp. II</i>                                     | n/a | 6.09 | unknown | 130 | 34.7 | 5399 | FOLO01000000 |
| DSM 6065         | <b><i>P. undina</i></b>                              | n/a | 4.00 | 255x    | 49  | 39.9 | 3638 | AHCF02000000 |
| ECSMB14103       | <i>P. marina</i>                                     | n/a | 4.12 | 12x     | 32  | 39.7 | 3801 | JWGY01000000 |

|            |                                      |     |      |         |     |      |      |                    |
|------------|--------------------------------------|-----|------|---------|-----|------|------|--------------------|
| H103       | <i>P. carrageenovora</i> * (sp. VII) | n/a | 4.42 | 167.8x  | 21  | 39.4 | 3938 | LOFG01000000       |
| H105       | <i>P. sp. XV</i>                     | n/a | 4.47 | 93.4x   | 26  | 40.3 | 4087 | LOFH01000000       |
| H33        | <i>P. sp. XXIV</i>                   | n/a | 6.12 | 100x    | 151 | 42.0 | 5213 | AUXZ01000000       |
| H33-S      | <i>P. sp. XXIV</i>                   | n/a | 6.12 | 100x    | 143 | 42.0 | 5204 | AUXY01000000       |
| HI1        | <i>P. sp. XXII</i>                   | A   | 6.07 | 100x    | 10  | 42.2 | 5313 | JWIC01000000       |
| JCM 20779  | <b><i>P. piscicida</i></b>           | n/a | 5.28 | 196x    | 207 | 43.2 | 4729 | AHCC02000000       |
| JG1        | <i>P. elyakovii/piscicida</i>        | n/a | 5.50 | 112x    | 118 | 42.3 | 4862 | AJMP01000000       |
| NCIMB 2033 | <b><i>P. flavipulchra</i></b>        | n/a | 4.50 | 159x    | 40  | 39.2 | 4032 | JTDZ01000000       |
| NCIMB 1942 | <i>P. sp. XXVII</i>                  | C   | 5.48 | 100x    | 226 | 42.0 | 4985 | AUXT01000000       |
| NCIMB_1944 | <i>P. sp. XXV</i>                    | A   | 6.36 | 100x    | 107 | 42.3 | 5450 | AUXS01000000       |
| NCIMB_2035 | <i>P. sp. XXVII</i>                  | C   | 5.50 | 100x    | 263 | 42.1 | 5039 | JPWZ01000000       |
| ND6B       | <i>P. issachenkonii</i> * (sp. X)    | n/a | 4.24 | 523x    | 90  | 40.4 | 3849 | JQFL01000000       |
| NJ631      | <i>P. elyakovii/piscicida</i>        | n/a | 5.35 | 108x    | 55  | 43.4 | 4690 | AKXJ01000000       |
| NW 4327    | <i>P. atlantica</i> * (sp. VI)       | n/a | 4.48 | 195x    | 129 | 40.9 | 3995 | AZIO01000000       |
| O-BC30     | <b><i>P. phenolica</i></b>           | A   | 4.76 |         | 282 | 40.5 | 5082 | RCWG00000000       |
| OCN003     | <b><i>P. piratica</i></b>            | n/a | 4.82 | 142x    | 2   | 40.0 | 4384 | CP009888, CP009889 |
| OCN096     | <i>P. sp. XXI</i>                    | n/a | 5.82 | 80x     | 460 | 47.8 | 5614 | LFZX01000000       |
| PAMC_22718 | <i>P. issachenkonii</i> * (sp. X)    | n/a | 4.18 | 131.35x | 56  | 40.2 | 3896 | AJTK01000000       |
| PS5        | <i>P. peptidolytica</i> * (sp. IV)   | D   | 5.08 |         | 267 | 42.5 | 4540 | RCSQ00000000       |
| R3         | <i>P. sp. XX</i>                     | n/a | 5.84 | 364.1x  | 39  | 47.6 | 5002 | LJDF01000000       |
| S2040      | <i>P. elyakovii/piscicida</i>        | n/a | 5.00 | 97x     | 126 | 43.4 | 4372 | JXXW01000000       |
| S2292      | <i>P. fuliginea</i>                  | n/a | 4.73 | 382x    | 281 | 38.9 | 4125 | JXYD01000000       |
| S2471      | <i>P. sp. XIX</i>                    | n/a | 5.76 | 104x    | 165 | 48.9 | 4836 | JXYA01000000       |

|             |                                               |     |      |         |     |      |      |                          |
|-------------|-----------------------------------------------|-----|------|---------|-----|------|------|--------------------------|
| S2607       | <i>P. sp. XXVI</i>                            | A   | 5.94 | 100x    | 73  | 42.2 | 5105 | AUXV01000000             |
| S2724       | <i>P. elyakovii/piscicida</i>                 | n/a | 5.20 | 101x    | 205 | 43.3 | 4575 | JXXX01000000             |
| S3137       | <i>P. ruthenica*</i> (sp. V)                  | n/a | 4.07 | 136x    | 37  | 47.4 | 3744 | JXXZ01000000             |
| S3258       | <i>P. ruthenica*</i> (sp. V)                  | n/a | 4.07 | 134x    | 45  | 47.4 | 3745 | JXXY01000000             |
| S3431       | <i>P. fuliginea</i>                           | n/a | 4.20 | 130x    | 165 | 38.9 | 3690 | JJNY01000000             |
| S4047-1     | <i>P. sp. XXIII</i>                           | E   | 6.06 | 100x    | 180 | 41.6 | 5210 | AUXU01000000             |
| S4054       | <i>P. sp. XXIII</i>                           | E   | 6.06 | 100x    | 219 | 41.6 | 5207 | AUXW01000000             |
| S4060_1     | <i>P. sp. XXVI</i>                            | A   | 5.95 | 100x    | 74  | 42.2 | 5213 | AUXX01000000             |
| S8_38       | <i>P. arctica</i>                             | n/a | 4.98 | 100x    | 80  | 39.2 | 4435 | AUTS01000000             |
| S8_8        | <i>P. arctica</i>                             | n/a | 4.91 | 100x    | 79  | 39.2 | 4383 | AUTR01000000             |
| S816        | <i>P. atlantica*</i> (sp. VI)                 | n/a | 4.42 | 130x    | 133 | 40.9 | 4127 | APME01000000             |
| SCSIO_04301 | <i>P. donghaensis/lipolytica*</i> (sp. XVIII) | n/a | 4.73 | 145.0x  | 20  | 41.3 | 4198 | JGI Taxon ID: 2568526619 |
| SCSIO_11900 | <i>P. issachenkonii*</i> (sp. X)              | n/a | 3.72 | 183.0x  | 22  | 40.5 | 3525 | JEMJ01000000             |
| SM9913      | <i>P. issachenkonii*</i> (sp. X)              | n/a | 4.04 | unknown | 2   | 40.3 | 3686 | CP001796, CP001797       |
| TAB23       | <i>P. arctica</i>                             | n/a | 5.14 | 100x    | 367 | 39.1 | 4771 | AUTP01000000             |
| TAC125      | <i>P. nigrifaciens*</i> (sp. XIII)            | n/a | 3.85 | unknown | 2   | 40.1 | 3480 | CR954246, CR954247       |
| TAE56       | <i>P. arctica</i>                             | n/a | 4.60 | 100x    | 163 | 39.0 | 4221 | AUTN01000000             |
| TAE79       | <i>P. distincta/flavipulchra</i>              | n/a | 5.05 | 100x    | 298 | 39.3 | 4819 | AUTL01000000             |
| TAE80       | <i>P. distincta/flavipulchra</i>              | n/a | 4.97 | 100x    | 360 | 39.3 | 4750 | AUTM01000000             |
| TB13        | <i>P. arctica</i>                             | n/a | 4.73 | 100x    | 254 | 39.1 | 4384 | AUTJ01000000             |
| TB25        | <i>P. distincta/flavipulchra</i>              | n/a | 4.65 | 100x    | 458 | 39.2 | 4224 | AUTI01000000             |
| TB41        | <i>P. issachenkonii*</i> (sp. X)              | n/a | 4.63 | 100x    | 122 | 40.3 | 4237 | AUTH01000000             |



|               |                                                   |     |      |         |     |      |      |              |
|---------------|---------------------------------------------------|-----|------|---------|-----|------|------|--------------|
| TB51          | <i>P. atlantica</i> * (sp. VI)                    | n/a | 4.63 | 100x    | 369 | 40.9 | 4365 | AUTO01000000 |
| TB64          | <i>P. sp. XII</i>                                 | n/a | 4.69 | 100x    | 275 | 37.9 | 4367 | AUTQ01000000 |
| UCD_SED14     | <i>P. sp. XIV</i>                                 | n/a | 4.81 | 133.86x | 111 | 39.9 | 4306 | LHPH01000000 |
| UCD_SED8      | <i>P. undina</i>                                  | n/a | 4.02 | 377x    | 33  | 40.0 | 3628 | LITK01000000 |
| UCD_SED9      | <i>P. sp. XIV</i>                                 | n/a | 4.85 | 177x    | 101 | 39.7 | 4303 | LITL01000000 |
| UCD-33C       | <i>P. arabiensis/shioyasakiensis</i> * (sp. XVII) | n/a | 4.47 | 90x     | 48  | 41.3 | 3951 | LJTB01000000 |
| UCD-48B       | <i>P. arabiensis/shioyasakiensis</i> * (sp. XVI)  | n/a | 4.59 | 96x     | 69  | 41.1 | 4109 | LJTC01000000 |
| UST010723-006 | <b><i>P. spongiae</i></b>                         | n/a | 4.72 | 217x    | 56  | 40.8 | 4241 | AHCE02000000 |

**Table S4. PCR primer sequences.**

| Gene            | Forward primer sequence        | Reverse primer sequence        | T <sub>m</sub> (°C) |
|-----------------|--------------------------------|--------------------------------|---------------------|
| 16S             | 5' GGCAGCAGTGGGGAATAT 3'       | 5' GGTTATCACCGGCAGTCTC 3'      | 55                  |
| <i>gyrB</i>     | 5' THGGBGAYACNGAYGATG 3'       | 5' GGRTCCATNGBGTYTCCC 3'       | 53                  |
| <i>pyrH</i>     | 5' GTAGARYTMGACRTAGAAGTRGGT 3' | 5' GTDCCYTCNTCTTCVCCCATR 3'    | 52                  |
| <i>recA</i>     | 5' GGHCCWGARTCDTCRGGTAA 3'     | 5' GGHGGNGCHACYTTGTTYT 3'      | 52                  |
| <i>rpoD</i>     | 5' CVCCDGATGCYGATGARYT 3'      | 5' GCYTTNGCTTCDATYTGA 3'       | 55                  |
| <i>bmp2</i>     | 5' GAYGTHGTYATTATTGGYAGYGG 3'  | 5' CATYTGYTTTRCGRTCCTAYTCTT 3' | 52                  |
| <i>bmp5</i>     | 5' GCAGTSATHGGKGCTGGTTTATC 3'  | 5' GGCCARGARCTDATRTTKGG 3'     | 52                  |
| <i>1942bmp1</i> | 5' AGGCGCCGGGTTTAAGCAGC 3'     | 5' TCGCGGGTAACCACGACCAA 3'     | 55                  |
| <i>2035bmp1</i> | 5' AGGCGCCGGGTTTAAGCAGC 3'     | 5' TCGTGGTTACCCGCGACAAACA 3'   | 55                  |
